# Supplementary material for: Fabrication of a Novel CNT-COO−/Ag3PO4@AgIO4Composite with Enhanced Photocatalytic Activity under Natural Sunlight
Source: Molecules. 2023 Feb 7;28(4):1586. doi: 10.3390/molecules28041586 (PMC9967086; doi:10.3390/molecules28041586)
Supplement: Supplementary file 1 [file molecules-28-01586-s001.zip › molecules-2156489-supplementary.pdf]

## Supporting Information for

# Fabrication of a novel CNT-COO<sup>-</sup>/Ag<sub>3</sub>PO<sub>4</sub>@AgIO<sub>4</sub> Composite with Enhanced Photocatalytic Activity under Natural Sunlight

## 1. Characterization

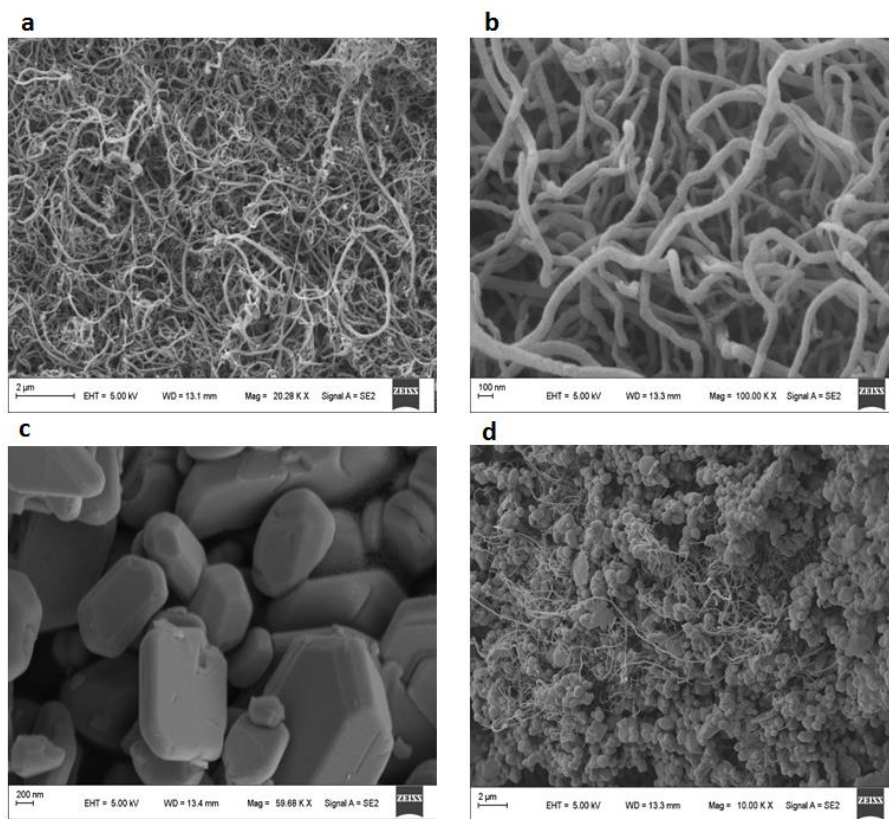

**Figure S1-** SEM image of (a) nonpurified CNT, (b) purified CNT, (c) AgIO<sub>4</sub>, (d) CNT/Ag<sub>3</sub>PO<sub>4</sub>@AgIO<sub>4</sub>.

## 2. Photocatalytic Degradation Results and Analysis.

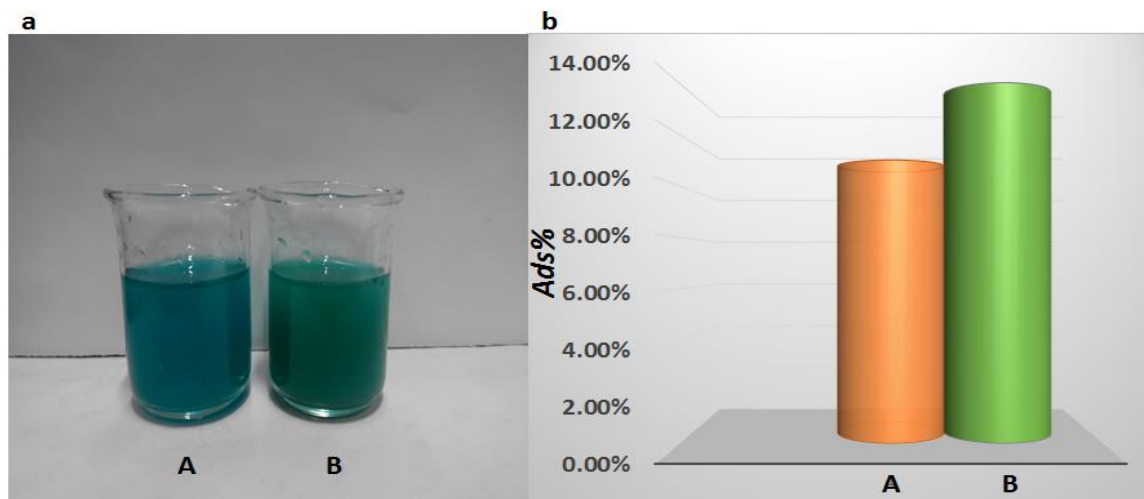

**Figure S2-** (a) Image of the dispersion of (A) CNT/Ag<sub>3</sub>PO<sub>4</sub>@AgIO<sub>4</sub> and (B) CNT-COO/Ag<sub>3</sub>PO<sub>4</sub>@AgIO<sub>4</sub>, in MB aqueous solution. (b) The adsorption of MB over: (A) CNT/Ag<sub>3</sub>PO<sub>4</sub>@AgIO<sub>4</sub> and (B) CNT-COO/Ag<sub>3</sub>PO<sub>4</sub>@AgIO<sub>4</sub> composites.

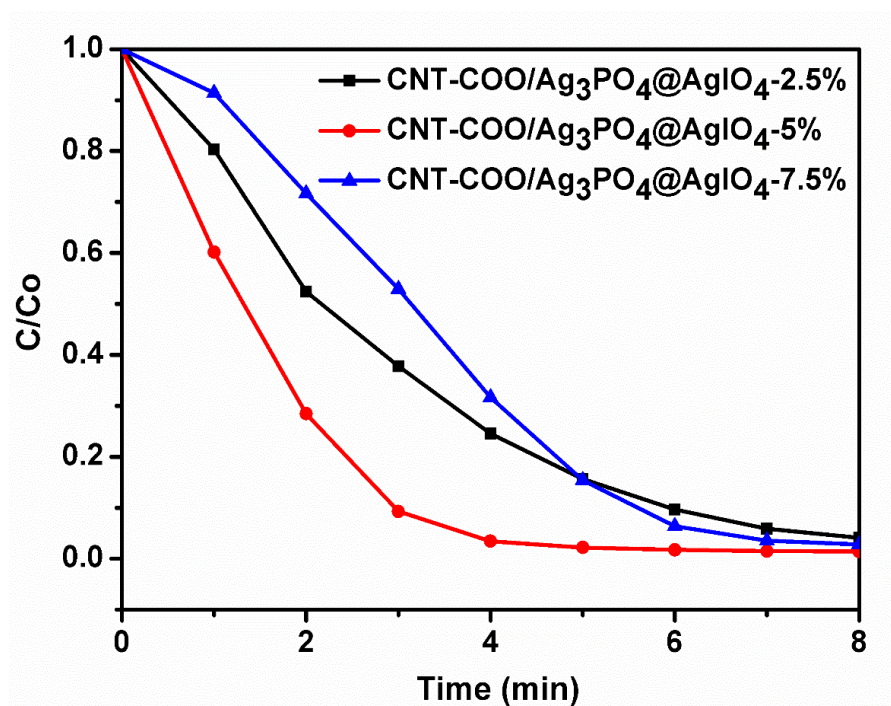

**Figure S3-** The photodegradation of MB over CNT-COO/Ag<sub>3</sub>PO<sub>4</sub>@AgIO<sub>4</sub> with different CNT-COO contents.

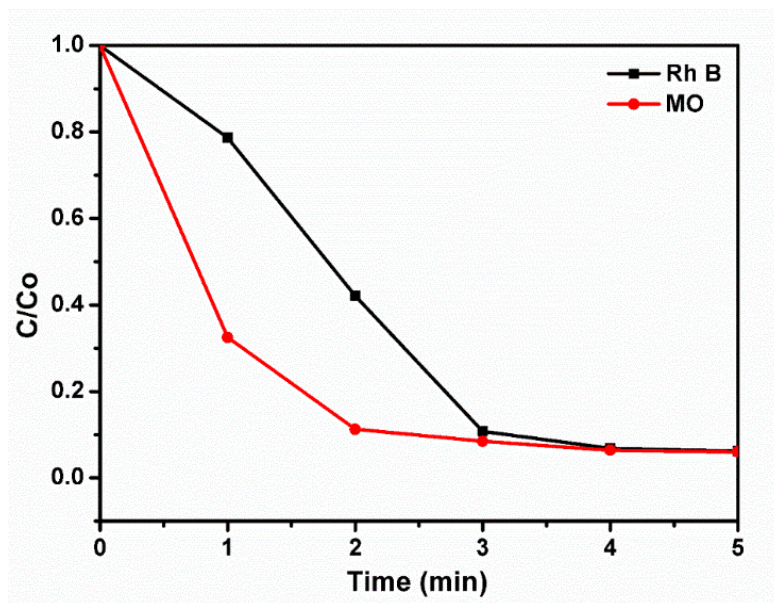

**Figure S4-** The photodegradation of different organic dyes over CNT-COO/Ag<sub>3</sub>PO<sub>4</sub>@AgIO<sub>4</sub>-5%, under sunlight irradiation.

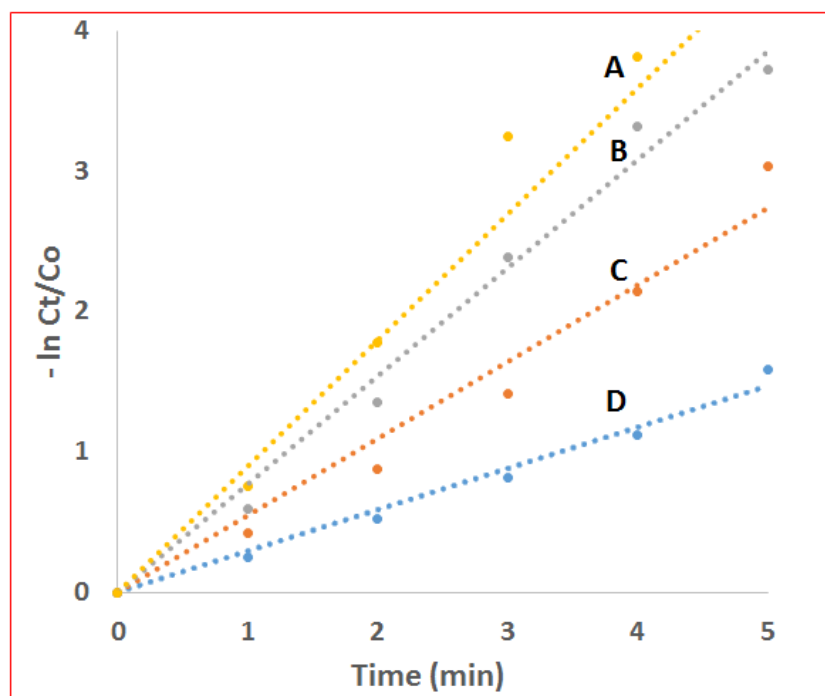

**Figure S5-** Regression curves of  $-\ln(C_t/C_0)$  versus irradiation time for CNT-COO/Ag<sub>3</sub>PO<sub>4</sub>@AgIO<sub>4</sub>-5% under different light intensities (A) 100%, (B) 75%, (C) 50%, (D) 25%.
